# Supplementary material
Source: HighWire-hosted journal article supplement (https://bmjopen.bmj.com/content/11/11/e053595)
Supplement: inline-supplementary-material-1 [file inline-supplementary-material-1.pdf]

- 1 Supplementary material
- 2 **Epidemiological questionnaire.** Interview guide for personnel in charge of the phone line
- 3 specific for COVID-19 cases and contacts, set up by the Health Secretariat of the Municipality
- 4 of San Antonio de Areco, Buenos Aires Province, Argentina.

| Question Categories        | Specific Questions: Possible answers                                                                                                                                                                                                                                                                                                                                                                                                                                                                                                                                                                                                                                                                                                                               |
|----------------------------|--------------------------------------------------------------------------------------------------------------------------------------------------------------------------------------------------------------------------------------------------------------------------------------------------------------------------------------------------------------------------------------------------------------------------------------------------------------------------------------------------------------------------------------------------------------------------------------------------------------------------------------------------------------------------------------------------------------------------------------------------------------------|
| Date of first contact      | DD/MM/YYYY                                                                                                                                                                                                                                                                                                                                                                                                                                                                                                                                                                                                                                                                                                                                                         |
| Personal Data              | Last name<br>First and middle name<br>Gender: Female/Male/Other<br>Age (in years)<br>National Identification Number<br>Phone number<br>Place of residence<br>Number of co-inhabitants                                                                                                                                                                                                                                                                                                                                                                                                                                                                                                                                                                              |
| Clinical information       | Onset of symptoms date: DD/MM/YYYY<br>List of symptoms: Symptoms according to case definition determined by national guidelines <sup>18</sup><br>Asymptomatic: Yes or no<br>Presence of co-morbidities: Diabetes, hypertension, overweight, obesity, respiratory disease, pregnancy, or none                                                                                                                                                                                                                                                                                                                                                                                                                                                                       |
| Epidemiological background | Occupation: Housewife, individuals who care for elders, employee with attention to the public, employee without attention to the public, cleaning staff, student, babysitter, factory worker, industrial plant workers, education staff, healthcare worker, civil defense employee, firefighter, private security personnel, driver of public transport or governmental entity, rural worker, retired employee, unemployed, other.<br>Place of work<br>Possible exposure background<br>Travel to COVID-19 risk area: Yes/No<br>Possible infection in center for the elderly or disabled<br>Close contact of a COVID-19 confirmed case*<br>Unknown source of infection<br>Positive due to routine pre-surgery test<br>Positive during regular surveillance<br>Other |
| Case information           | Last name<br>First and middle name<br>Home/Family<br>Work<br>Social event                                                                                                                                                                                                                                                                                                                                                                                                                                                                                                                                                                                                                                                                                          |

|                |                                                                                                   |
|----------------|---------------------------------------------------------------------------------------------------|
|                | School<br>Other<br>Healthcare coverage<br>Private health insurance<br>Exclusive public healthcare |
| Action to take | Isolation<br>Appointment for nasopharyngeal swab<br>Call back<br>Other                            |

5       \*If the person is a contact of a confirmed case, continue to the “Case information” section.

6

7

8

9

10

11

12

13

14

15

16

17

18

19

20

- 21 **Supplementary Table 1.** Case and contact definitions used during the health intervention for  
 22 active surveillance and mitigation of SARS-CoV-2 in San Antonio de Areco, Buenos Aires,  
 23 Argentina.

| Term                                                                           | Definition                                                                                                                                                                                                                                                                                                                                                                                                                                                                                                                                                               |
|--------------------------------------------------------------------------------|--------------------------------------------------------------------------------------------------------------------------------------------------------------------------------------------------------------------------------------------------------------------------------------------------------------------------------------------------------------------------------------------------------------------------------------------------------------------------------------------------------------------------------------------------------------------------|
| Suspected case                                                                 | <ul style="list-style-type: none"> <li>- Any person, regardless of age, who presented two or more of the following symptoms: Fever (<math>\geq 37.5^{\circ}\text{C}</math>), cough, odynophagia, difficulty breathing, headache, diarrhoea or vomiting, or</li> <li>- any person with sudden loss of taste or smell with no other cause, or</li> <li>- any at risk person* with at least one of the following symptoms: Fever (<math>\geq 37.5^{\circ}\text{C}</math>), cough, odynophagia, difficulty breathing, sudden loss of taste or smell.<sup>18</sup></li> </ul> |
| Symptomatic compatible case not included in the definition of a suspected case | Any patient not presenting all the characteristics of a suspected case, but presenting one of the symptoms described for COVID-19, including fever or chills, dry cough, shortness of breath or difficulty breathing, fatigue, muscle or body aches, headache, new loss of taste or smell, sore throat, congestion or runny nose, nausea or vomiting, or diarrhoea.                                                                                                                                                                                                      |
| Confirmed case                                                                 | Any case with a positive RT-PCR for SARS-CoV-2.                                                                                                                                                                                                                                                                                                                                                                                                                                                                                                                          |
| Close cohabiting contact                                                       | A person that lives in the same household as a confirmed case.                                                                                                                                                                                                                                                                                                                                                                                                                                                                                                           |
| Close work contact                                                             | A person in contact with a confirmed case at work at any moment without the use of a face mask.                                                                                                                                                                                                                                                                                                                                                                                                                                                                          |
| Work contact                                                                   | A person in contact with a confirmed case at work in compliance with security measures.                                                                                                                                                                                                                                                                                                                                                                                                                                                                                  |
| High-risk social contact                                                       | Incidental contact with a confirmed case for more than 15 minutes                                                                                                                                                                                                                                                                                                                                                                                                                                                                                                        |

|                             |                                                                                                            |
|-----------------------------|------------------------------------------------------------------------------------------------------------|
|                             | or without the use of a face mask or less than 2 meters distance.                                          |
| Low-risk incidental contact | Incidental contact with a confirmed case for less than 15 minutes or outdoors with the use of a face mask. |

24 \*Healthcare worker, lives or works in closed institutions (penitentiary institutions, residences  
25 for the elderly, mental institutions, children’s homes), essential personnel (military personnel,  
26 caretakers), are vulnerable population due to their living conditions, indigenous populations,  
27 or close contact of a confirmed case and presented at least one symptom within the following  
28 14 days since contact.<sup>18</sup>

29

30

31

32

33

34

35

36

37

38

39

40

41

42

43 **Supplemental Table 2.** At risk-groups individuals under routine epidemiological surveillance,  
 44 district of San Antonio de Areco, Buenos Aires Province, Argentina: characteristics, criteria and  
 45 frequency of testing. Analysis of all the samples were performed in the laboratory of the  
 46 Hospital de Clínicas located in Buenos Aires City.

| Population                                                                        | Employer     | Criteria                                                   | Frequency of testing/<br>Type of sample |
|-----------------------------------------------------------------------------------|--------------|------------------------------------------------------------|-----------------------------------------|
| Healthcare workers                                                                | Municipality | Travels to or lives in an area with community transmission | Weekly/<br>Pooled samples               |
|                                                                                   |              | Resides and works in SAA                                   | Weekly/<br>Pooled samples               |
| Closed institution (homes for the elderly and residence for disabled individuals) | Municipality | All the personnel                                          | Weekly/<br>Pooled samples               |
|                                                                                   | Private      | Individuals that work in more than one institution         | Weekly/<br>Pooled samples               |
| Patients undergoing surgery                                                       | NA           | All patients with planned surgeries                        | Once/<br>Pooled samples                 |
| Workers under risk due to their occupation                                        | Private      | Based on the epidemiological context                       | Once/<br>Pooled samples                 |
| Symptomatic compatible case not                                                   | NA           | Based on the epidemiological                               | Once/<br>Pooled samples or              |

|                                                |    |                                                         |                                      |
|------------------------------------------------|----|---------------------------------------------------------|--------------------------------------|
| included in the definition of a suspected case |    | context or type of contact                              | individually                         |
| Asymptomatic contacts of a confirmed case      | NA | Based on the epidemiological context or type of contact | Once/ Pooled samples or individually |

47 SAA: San Antonio de Areco. NA: Not applicable.

48
